# Supplementary material
Source: Royal Society of Chemistry journal article supplement (doi:10.1039/d6cp01609j)
Supplement: d6cp01609j1.pdf [file d6cp01609j1.pdf]

## Supplementary Information

# Unveiling the Synergy of Delocalized O 2*p* Holes and Localized Ce 4*f* States for Enhanced NH<sub>3</sub>-SCR Activity on WO<sub>3</sub>/La-CeO<sub>2</sub> Catalyst

Zi-Yi Guo<sup>1</sup>, Zhi-Qiang Wang<sup>1,\*</sup>, and Xue-Qing Gong<sup>2,\*</sup>

<sup>1</sup>State Key Laboratory of Green Chemical Engineering and Industrial Catalysis, Centre for Computational Chemistry and Research Institute of Industrial Catalysis, School of Chemistry and Molecular Engineering, East China University of Science and Technology, 130 Meilong Road, Shanghai 200237, China.

<sup>2</sup>State Key Laboratory of Synergistic Chem-Bio Synthesis, School of Chemistry and Chemical Engineering, Shanghai Jiao Tong University, 800 Dongchuan Road, Shanghai 200240, China.

\*E-mails: zhiqiangwang@ecust.edu.cn; xqgong@sjtu.edu.cn

## Additional figures

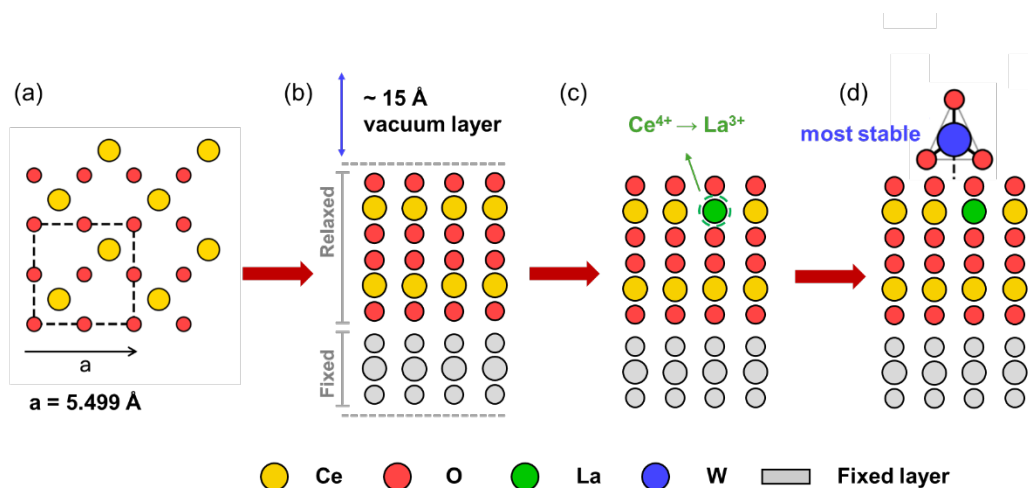

**Scheme S1.** Schematic illustration of the construction procedure for the  $\text{WO}_3/\text{La-CeO}_2(111)$  surface model. (a) Calculated structure of bulk  $\text{CeO}_2$  unit cell (fluorite structure); (b)  $\text{CeO}_2(111)$  slab model (side view) containing three O-Ce-O tri-layers. The bottom O-Ce-O tri-layer is fixed (gray), and a vacuum layer region of  $\sim 15 \text{ \AA}$  is added; (c) La-doped  $\text{CeO}_2(111)$  slab model (side view) with a single La atom (green) substituting a surface Ce atom; (d)  $\text{WO}_3/\text{La-CeO}_2(111)$  surface with a tetrahedral  $\text{WO}_3$  cluster deposited on the La-doped surface representing the most stable loading structure.

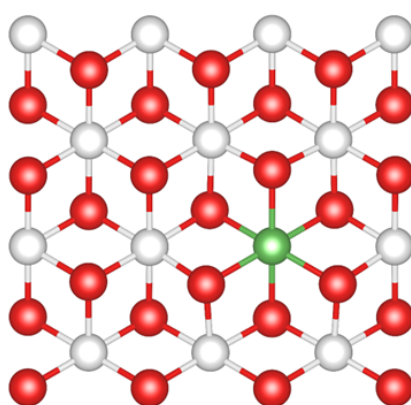

**Figure S1.** Calculated structure (top view) of  $\text{La-CeO}_2(111)$  surface. White: Ce, red: O, green: La, these notations are used throughout the paper.

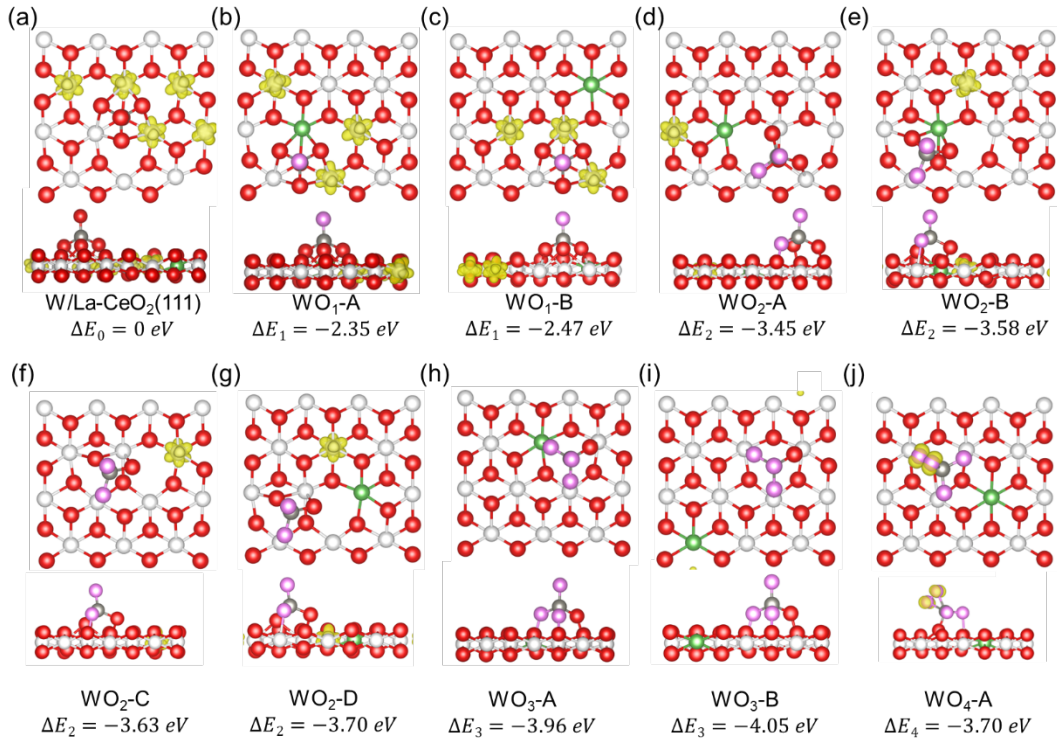

**Figure S2.** Calculated relative energies ( $\Delta E_x$ ,  $x = 0-4$ ) and spin charge density differences (in yellow) of (a) W/La-CeO<sub>2</sub>(111), (b-c) WO<sub>1</sub>/La-CeO<sub>2</sub>(111), (d-g) WO<sub>2</sub>/La-CeO<sub>2</sub>(111), (h-i) WO<sub>3</sub>/La-CeO<sub>2</sub>(111) and (j) WO<sub>4</sub>/La-CeO<sub>2</sub>(111) surfaces. The upper and lower panels show the top and side views, respectively. Grey: W, pink: O of WO<sub>x</sub>, and these notations are used throughout the paper.

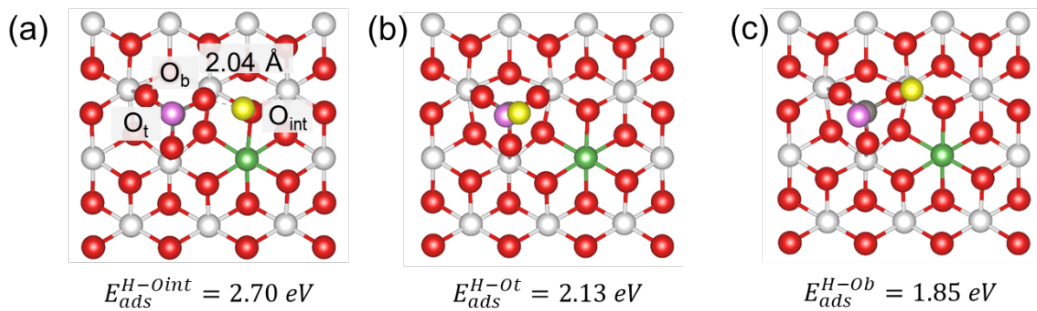

**Figure S3.** Calculated structures (top view) and adsorption energies of a single H at the O<sub>int</sub>, O<sub>t</sub>, and O<sub>b</sub> sites on the WO<sub>3</sub>/La-CeO<sub>2</sub>(111) surface. Yellow: H atoms, pink: O of WO<sub>x</sub>, these notations are used throughout the paper.

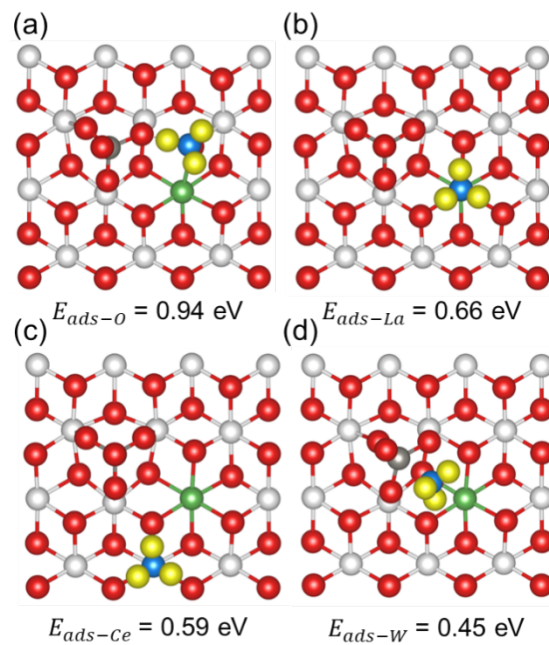

**Figure S4.** Calculated structures (top view) and adsorption energies of  $\text{NH}_3$  adsorbed at different sites on the  $\text{WO}_3/\text{La-CeO}_2(111)$  surface. Blue: N atoms, these notations are used throughout the paper.

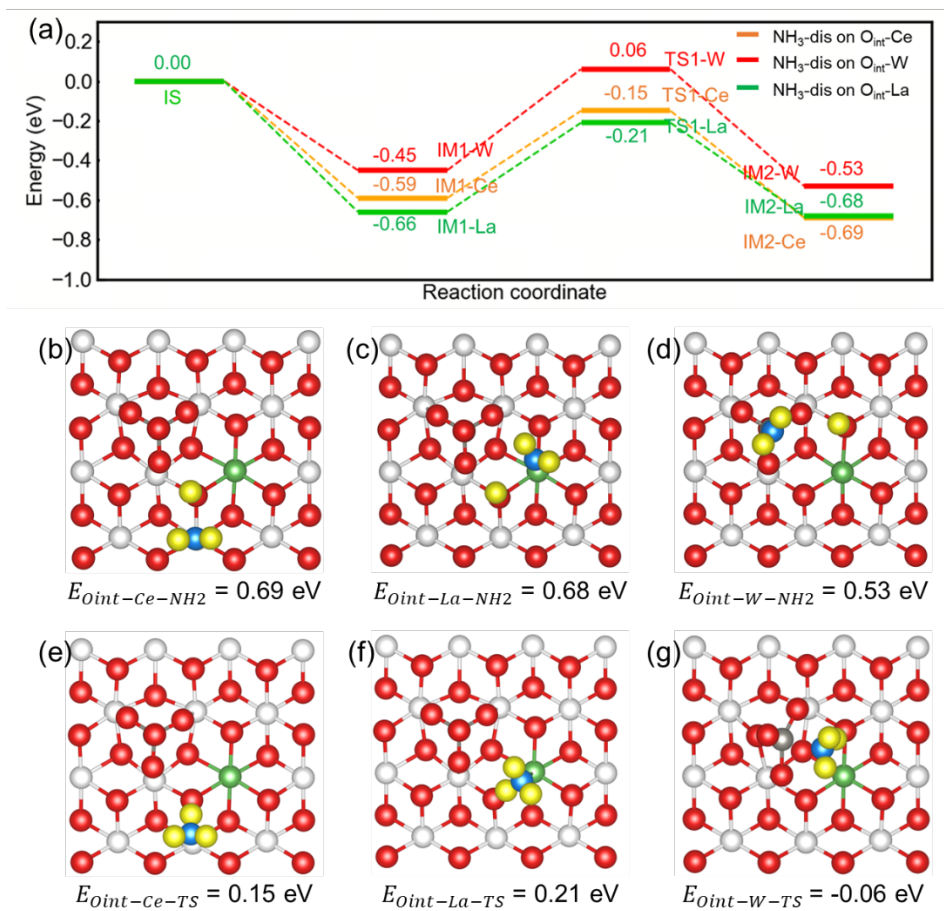

**Figure S5.** (a) Calculated energy profiles for NH<sub>3</sub> dissociation at the O<sub>int</sub>-Ce, O<sub>int</sub>-La, and O<sub>int</sub>-W sites on the WO<sub>3</sub>/La-CeO<sub>2</sub>(111) surface. (b-g) Calculated adsorption energies and key structures (top view) of the transition states and intermediates during the NH<sub>3</sub> dissociation at the O<sub>int</sub>-Ce, O<sub>int</sub>-La, and O<sub>int</sub>-W sites on the WO<sub>3</sub>/La-CeO<sub>2</sub>(111) surface. This figure complements Figure 3 by presenting the energy profiles and key structures of alternative NH<sub>3</sub> dissociation pathways at different M-O sites on the WO<sub>3</sub>/La-CeO<sub>2</sub>(111) surface.

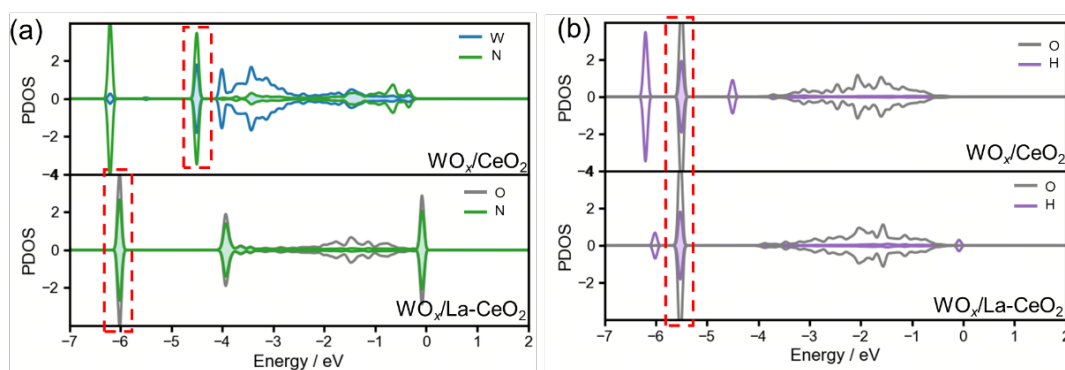

**Figure S6.** (a) Calculated projected DOS (PDOS) of the  $\text{NH}_2^*$  species in the final states of  $\text{NH}_3$  dissociation at W-O on the  $\text{WO}_3/\text{CeO}_2$  surface and  $\text{O}_{\text{int}}\text{-O}_b$  sites on the  $\text{WO}_3/\text{La-CeO}_2$  surface. (b) Calculated projected DOS (PDOS) of the  $\text{O-H}^*$  species in the final states of  $\text{NH}_3$  dissociation at W-O on the  $\text{WO}_3/\text{CeO}_2$  surface and O-O sites on the  $\text{WO}_3/\text{La-CeO}_2$  surface. All PDOSs were aligned with respect to the  $2s$  energy level of the fixed oxygen in the slab.

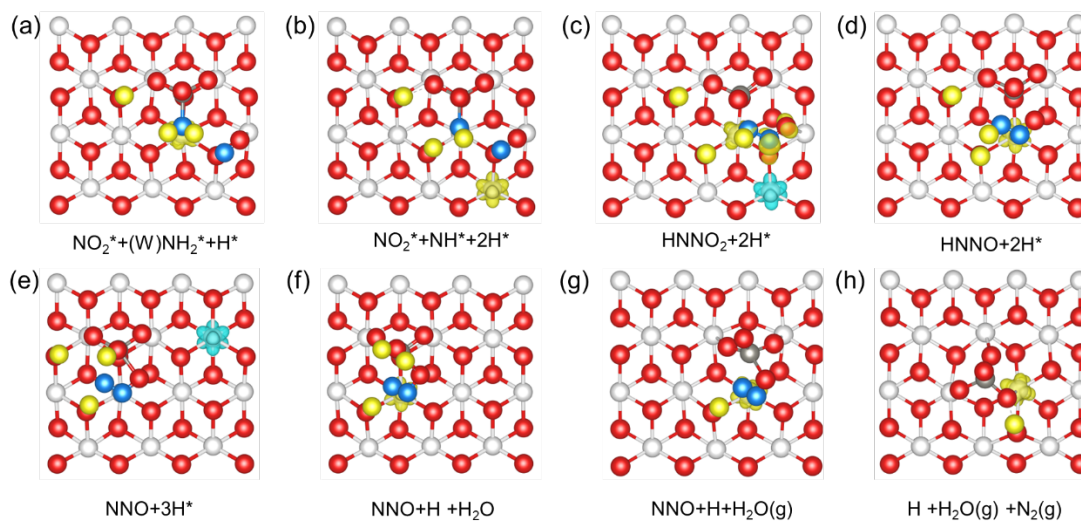

**Figure S7.** Calculated structures (top view) of key intermediates along  $\text{NH}_3$ -SCR pathway on the  $\text{WO}_3/\text{CeO}_2(111)$  surface.

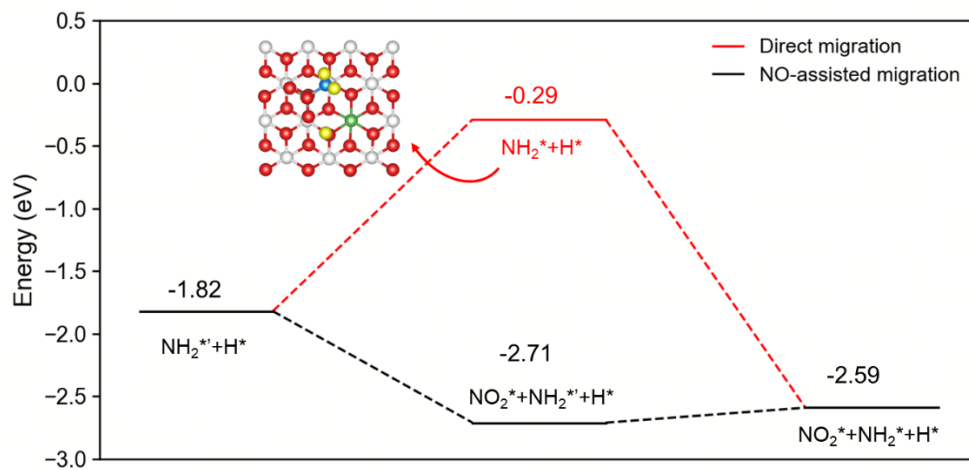

**Figure S8.** Calculated reaction energy profiles for two  $\text{NH}_2^*$  migration pathways to the  $\text{WO}_x$  cluster site, *i.e.*, the direct pathway (red) and the NO-assisted pathway (black).

**Table S1.** Convergence tests of key computational parameters (cutoff energy,  $k$ -point mesh, slab thickness) using the  $\text{NH}_3$  adsorption energy ( $E_{\text{ads}}$ , eV) at the  $\text{O}_{\text{int}}$  site on the  $\text{WO}_3/\text{La-CeO}_2(111)$  surface as a benchmark.

| Parameter      | Setting                                  | $E_{\text{ads}}$ (eV) | $\Delta E_{\text{ads}}$ (eV) |
|----------------|------------------------------------------|-----------------------|------------------------------|
| Cutoff energy  | 400 eV (this work)                       | 0.94                  | -                            |
|                | 450 eV                                   | 0.94                  | 0.00                         |
|                | 500 eV                                   | 0.94                  | 0.00                         |
| K-point mesh   | $1 \times 1 \times 1$ ( $\Gamma$ -point) | 0.90                  | 0.04                         |
|                | $2 \times 2 \times 1$ (this work)        | 0.94                  | -                            |
|                | $3 \times 3 \times 1$                    | 0.94                  | 0.00                         |
| Slab thickness | 3 O-Ce-O tri-layers (this work)          | 0.94                  | -                            |
|                | 4 O-Ce-O tri-layers                      | 0.94                  | 0.00                         |
|                | 5 O-Ce-O tri-layers                      | 0.95                  | 0.01                         |

**Table S2.** Calculated Ce/La-O bond lengths on the  $\text{CeO}_2(111)$  and  $\text{La-CeO}_2(111)$  surfaces. The listed values correspond to the seven coordinated O atoms around the cation center, including six lateral O atoms and one subsurface O atom.

| Surface                        | Bond lengths / $\text{\AA}$        | Average length / $\text{\AA}$ |
|--------------------------------|------------------------------------|-------------------------------|
| <b>CeO<sub>2</sub>(111)</b>    | 2.37/2.37/2.37/2.37/2.37/2.37/2.37 | 2.37                          |
| <b>La-CeO<sub>2</sub>(111)</b> | 2.51/2.46/2.50/2.46/2.51/2.45/2.51 | 2.49                          |

**Table S3.** Calculated  $s$ - and  $p$ -resolved integrated projected density of states (IPDOS) of lattice oxygen on the CeO<sub>2</sub>(111), La-CeO<sub>2</sub>(111), WO<sub>3</sub>/CeO<sub>2</sub>(111), WO<sub>3</sub>/La-CeO<sub>2</sub>(111) and WO<sub>4</sub>/La-CeO<sub>2</sub>(111) surfaces.

|                                               | $N_{Olat,s}^{occ}$<br>/  e | $N_{Olat,s}^{unocc}$<br>/  e | $N_{Olat,p}^{occ}$<br>/  e | $N_{Olat,p}^{unocc}$<br>/  e |
|-----------------------------------------------|----------------------------|------------------------------|----------------------------|------------------------------|
| <b>CeO<sub>2</sub>(111)</b>                   | 153.32                     | 0.38                         | 330.74                     | 4.66                         |
| <b>La-CeO<sub>2</sub>(111)</b>                | 153.34                     | 0.38                         | 329.44                     | 5.50                         |
| <b>WO<sub>3</sub>/CeO<sub>2</sub>(111)</b>    | 153.54                     | 0.38                         | 330.68                     | 5.04                         |
| <b>WO<sub>3</sub>/La-CeO<sub>2</sub>(111)</b> | 153.41                     | 0.39                         | 328.28                     | 5.90                         |
| <b>WO<sub>4</sub>/La-CeO<sub>2</sub>(111)</b> | 153.30                     | 0.39                         | 328.30                     | 5.69                         |

**Table S4.** Calculated Bader charges of the W species on the WO<sub>1-4</sub>/La-CeO<sub>2</sub>(111) surfaces, and the Bader charges of O in the O<sub>2</sub> dimer on the WO<sub>4</sub>/La-CeO<sub>2</sub>(111) surface are also shown.

|                                               | <b>W Bader  e </b> | <b>O in O<sub>2</sub> dimer  e </b> |
|-----------------------------------------------|--------------------|-------------------------------------|
| <b>WO<sub>1</sub>/La-CeO<sub>2</sub>(111)</b> | 2.69               | /                                   |
| <b>WO<sub>2</sub>/La-CeO<sub>2</sub>(111)</b> | 2.68               | /                                   |
| <b>WO<sub>3</sub>/La-CeO<sub>2</sub>(111)</b> | 2.68               | /                                   |
| <b>WO<sub>4</sub>/La-CeO<sub>2</sub>(111)</b> | 2.68               | -0.35                               |

**Table S5.** Calculated adsorption energies of one H atom at different O sites on the  $\text{WO}_3/\text{CeO}_2(111)^{[1]}$  and  $\text{WO}_3/\text{La-CeO}_2(111)$  surfaces.

|                                               | $E_{\text{ads}}$ (eV) |                  |                  |
|-----------------------------------------------|-----------------------|------------------|------------------|
|                                               | H-O <sub>int</sub>    | H-O <sub>t</sub> | H-O <sub>b</sub> |
| <b>WO<sub>3</sub>/CeO<sub>2</sub>(111)</b>    | 1.30                  | 0.66             | 0.38             |
| <b>WO<sub>3</sub>/La-CeO<sub>2</sub>(111)</b> | 2.70                  | 2.13             | 1.85             |

**Table S6.** Calculated site- and orbital-resolved integrated projected density of states (IPDOS) for lattice O (s, p), W (d), Ce (f), La (d) on the  $\text{WO}_3/\text{La-CeO}_2(111)$  surface as well as for H adsorbed at the O<sub>int</sub>, O<sub>t</sub>, and O<sub>b</sub> sites of  $\text{WO}_3/\text{La-CeO}_2(111)$ .

|                          | $N_{\text{Olat},s}^{\text{occ}}$<br>/  e | $N_{\text{Olat},s}^{\text{unocc}}$<br>/  e | $N_{\text{Olat},p}^{\text{occ}}$<br>/  e | $N_{\text{Olat},p}^{\text{unocc}}$<br>/  e | $N_{\text{W},d}^{\text{occ}}$<br>/  e | $N_{\text{W},d}^{\text{unocc}}$<br>/  e | $N_{\text{Ce},f}^{\text{occ}}$<br>/  e | $N_{\text{Ce},f}^{\text{unocc}}$<br>/  e | $N_{\text{La},d}^{\text{occ}}$<br>/  e | $N_{\text{La},d}^{\text{unocc}}$<br>/  e |
|--------------------------|------------------------------------------|--------------------------------------------|------------------------------------------|--------------------------------------------|---------------------------------------|-----------------------------------------|----------------------------------------|------------------------------------------|----------------------------------------|------------------------------------------|
| <b>catalyst</b>          | 153.41                                   | 0.39                                       | 328.28                                   | 5.90                                       | 3.41                                  | 0.05                                    | 33.04                                  | 364.80                                   | 0.57                                   | 0.02                                     |
| <b>H-O<sub>int</sub></b> | 153.44                                   | 0.39                                       | 330.68                                   | 5.55                                       | 3.42                                  | 0.14                                    | 33.33                                  | 371.68                                   | 0.57                                   | 0.02                                     |
|                          | (0.02)                                   | (0.00)                                     | <b>(2.39)</b>                            | <b>(-0.35)</b>                             | (0.01)                                | (0.09)                                  | (0.28)                                 | (6.88)                                   | (0.00)                                 | (0.00)                                   |
| <b>H-O<sub>t</sub></b>   | 153.34                                   | 0.39                                       | 331.03                                   | 5.59                                       | 3.46                                  | 0.09                                    | 33.34                                  | 372.06                                   | 0.57                                   | 0.02                                     |
|                          | (-0.07)                                  | (0.00)                                     | <b>(2.75)</b>                            | <b>(-0.32)</b>                             | (0.05)                                | (0.04)                                  | (0.30)                                 | (7.26)                                   | (0.00)                                 | (0.00)                                   |
| <b>H-O<sub>b</sub></b>   | 153.34                                   | 0.40                                       | 331.00                                   | 5.59                                       | 3.41                                  | 0.07                                    | 33.29                                  | 372.27                                   | 0.58                                   | 0.02                                     |
|                          | (-0.07)                                  | (0.01)                                     | <b>(2.72)</b>                            | <b>(-0.32)</b>                             | (0.00)                                | (0.01)                                  | (0.25)                                 | (7.47)                                   | (0.01)                                 | (0.00)                                   |

## References

- [1] Z. Guo, C. Chen, K. C. Szeto, M. Taoufik, Z. Wang, X. Gong, Oxygen and Electron Storage Effects in W-Modified Ceria Catalysts for Ammonia Conversion, *Small*, 2024, **20**, 2406818.
